# Supplementary material for: Kollector: transcript-informed, targeted de novo assembly of gene loci
Source: PubMed Central journal article supplement — Bioinformatics. 2017 Feb 10;33(12):1782–8. doi: 10.1093/bioinformatics/btx078 (PMC5572715; doi:10.1093/bioinformatics/btx078), 2017-02-10
Supplement: btx078_supp.pdf [file btx078_supp.pdf]

## Kollektor Supplementary

**Algorithm S1:** Computing a progressive Bloom filter. In our algorithm  $r$  is depicted as an integer threshold but may actually also be set to be a value between 0 and 1 representing the a the score described in the BioBloom Tools publication (Chu et al. 2014) which is a score based on the the relative to the length of the read sequence.

**Input:** Parameters  $k$  and  $r$ , seed sequence  $q$  and set of reads pairs  $P = \{(p_0, p'_0), \dots, (p_{|R|}, p'_{|R|})\}$  with  $|q| \geq k$

**Output:** Bloom filter of tagged  $k$ -mers from reads and seed sequence

**Function** TagKmer( $q, P, k, r$ ) **begin**

```
 $F \leftarrow \emptyset$  //F is not a set, but a Bloom filter
for  $i \leftarrow 0$  to  $|q| - k + 1$  do //initial seed of the filter
   $F \leftarrow F \cup \text{kmer}(q[i], \dots, q[i+k])$ 
for  $i \leftarrow 0$  to  $|R|$  do //add seeds to filter
   $x \leftarrow 0, y \leftarrow 0$  //initialize  $k$ -mer overlap counts to 0
  for  $j \leftarrow 0$  to  $|p_i| - k + 1$  do //check if first read  $k$ -mers present
    if  $\text{kmer}(p_i[j], \dots, p_i[j+k]) \in F$  //increment if matches
       $x \leftarrow x + 1$ 
    for  $j \leftarrow 0$  to  $|p'_i| - k + 1$  do //check of second read  $k$ -mers present
      if  $\text{kmer}(p'_i[j], \dots, p'_i[j+k]) \in F$  //increment if matches
         $y \leftarrow y + 1$ 
    if  $x > r$  or  $y > r$  do //if  $k$ -mer counts reach threshold
      for  $j \leftarrow 0$  to  $|p_i| - k + 1$  do //insert  $k$ -mers of first read
         $F \leftarrow F \cup \text{kmer}(p_i[j], \dots, p_i[j+k])$ 
      for  $j \leftarrow 0$  to  $|p'_i| - k + 1$  do //insert  $k$ -mers of second read
         $F \leftarrow F \cup \text{kmer}(p'_i[j], \dots, p'_i[j+k])$ 
return  $F$ 
```

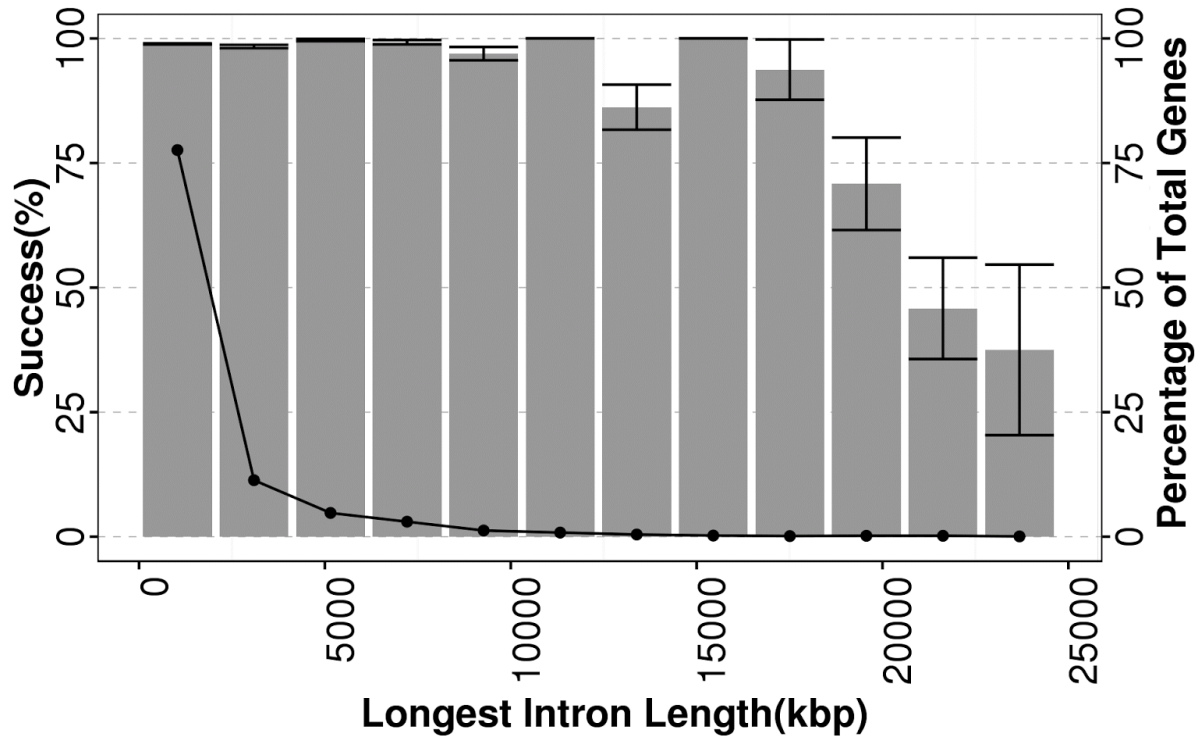

**Figure S1.** Proportion of successful gene assemblies vs longest introns (bars), with percentage of total genes in each bin(lines). 86% of the genes are concentrated in the first two bins

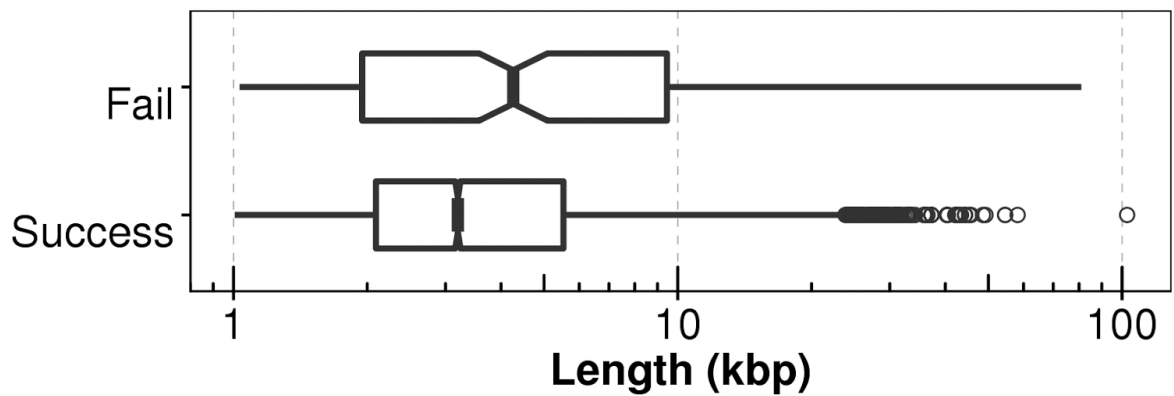

**Figure S2.** Length comparison between *C.elegans* target genes that are successfully assembled by Kollector and those failed to assemble. Notches in the boxes represent a 95% confidence interval around the median. Length difference between two groups is found to be statistically significant by Student's t-test ( $p=1.5 \times 10^{-5}$ )
